# Supplementary material for: Modeling propofol‐induced cardiotoxicity in the isolated‐perfused newborn mouse heart
Source: PubMed Central journal article supplement (PMC9350423; doi:10.14814/phy2.15402), 2022-08-03

Propofol exposure

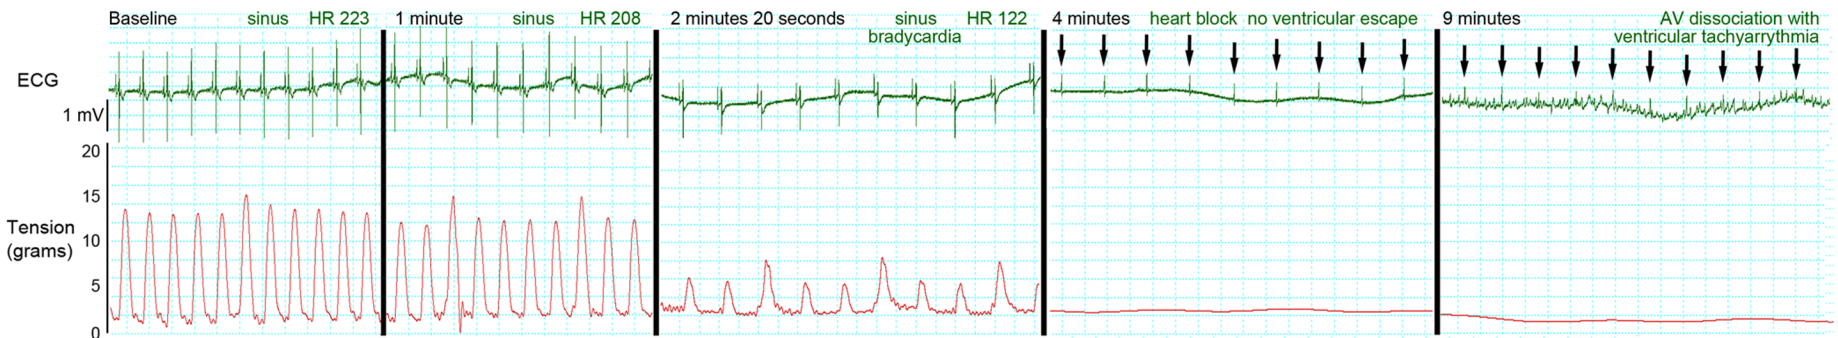

Post-exposure

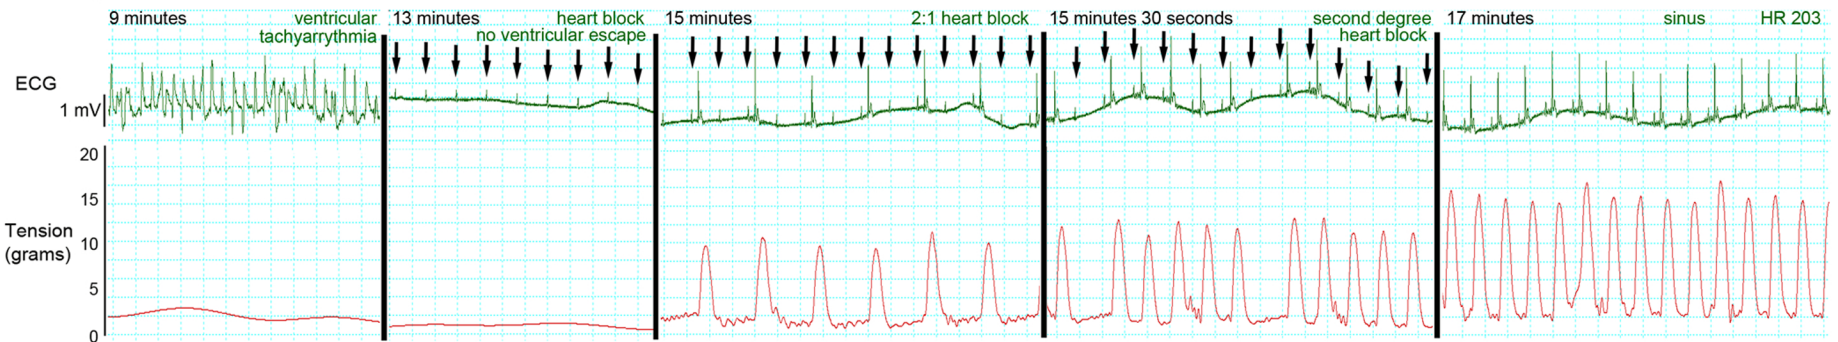

Supplement: PHY2-10-e15402-s003.pdf [file PHY2-10-e15402-s003.pdf]
